# Supplementary material
Source: Springer Nature journal article supplement (https://www.springermedizin.de/resource/supplementary/12936_2009_930_MOESM4_ESM.pdf/9548560)

*P. vivax*

*P. falciparum*

M

E

E

S

S

E

E

S

S

M

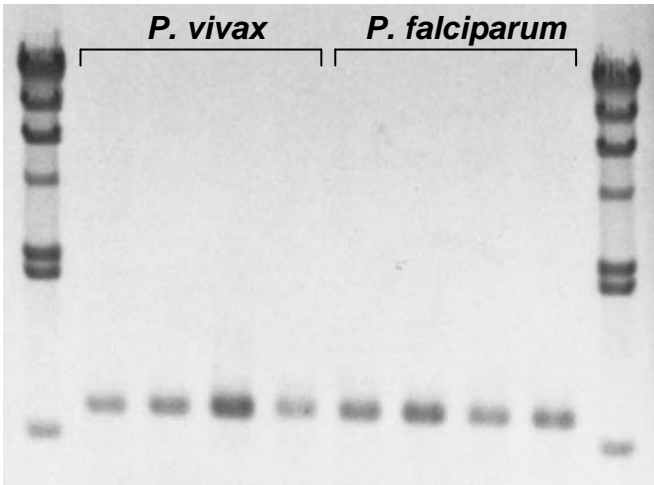

Supplement: MOESM4 [file 9548560]
